# Supplementary material for: Neonatal social communication and single genes predict the variability of post-pubertal social behavior in a mouse model of paternal 15q11-13 duplication
Source: Research Square preprint supplement (doi:10.21203/rs.3.rs-8552206/v1), 2026-02-16
Supplement: Supplementary file 1 [file 5c4325f7e64fedbad3471f00.docx]

**Neonatal social communication and single genes predict the variability of post-pubertal social behavior in a mouse model of paternal 15q11-13 duplication**

**Running title:** Developmental and gene-based prediction of post-pubertal social behavior

Takahira Yamauchi, MD, PhD1†, Kota Tamada, PhD2†, Takeshi Takano, PhD1,3†, Mitsuteru Nakamura, PhD1, Mariel Barbachan E. Silva, PhD 4, Kenny Ye, PhD5,6, Hitoshi Inada, PhD7,8, Takaki Tanifuji, MD, PhD1, Takeshi Hiramoto, PhD1, Lucas Stevens, BSc1, Gina Kang, BSc1, Marisa Esparza, BSc1, Takefumi Kikusui, PhD9, Noriko Osumi, MD, PhD7, Pilib Ó Broin, PhD4, Toru Takumi, MD, PhD2, Noboru Hiroi, PhD1,10,11*

† These authors contributed equally to the work.

**Affiliations**

1Department of Pharmacology, 10Department of Cellular and Integrative Physiology, 11Department of Cell Systems and Anatomy, University of Texas Health Science Center at San Antonio, San Antonio, Texas 78229, United States

2Department of Physiology and Cell Biology, Kobe University School of Medicine, Chuo, Kobe 650-0117, Japan

3Tokyo Denki University, Ishizuka, Hatoyama-machi, Hiki-gun, Saitama 350-0394, Japan

4School of Mathematics, Statistics & Applied Mathematics, National University of Ireland Galway, Galway, H91 TK33, Ireland

5Department of Epidemiology & Population Health, 6Department of Systems & Computational Biology, Albert Einstein College of Medicine, New York City, New York 10461, United States

7Department of Developmental Neuroscience, Tohoku University Graduate School of Medicine, Sendai 980-8575, Japan

8Headquarters for Co-Creation Strategy,National Institutes of Natural Sciences, Tokyo 105-0001, Japan

9Department of Animal Science and Biotechnology, Azabu University, Sagamihara, Kanagawa, Japan

*****Corresponding author: Noboru Hiroi, PhD

hiroi@uthscsa.edu

Department of Pharmacology; Department of Cellular and Integrative Physiology; Department of Cell Systems and Anatomy

University of Texas Health Science Center at San Antonio

Room 211B

7703 Floyd Curl Drive

San Antonio, TX 78229

1 210 567 4169 (tel)

Key words: social behavior, CNV, 15q11-13, prefrontal cortex, autism, schizophrenia, neonatal social communication, Magel2, Ndn, duplication, paternal imprinting

This PDF file includes:

Methods

Figures S1 to S14

Table S1 and S2

References

**METHODS**

Ultrasonic vocalization recording. The apparatus and procedure are detailed in our previous publications (1-3). Briefly, male pups were tested for vocalization during 5-minute maternal separation at postnatal day (P) P8 and P12 in a new home cage kept at 23°C to 26°C under a 30-lux light; these postnatal mouse ages correspond to term human infants (4). Testing took place during the light phase between 8:00 AM and 8:00 PM. The test cage was placed in a soundproof box. Ultrasonic vocalizations were recorded by UltraSoundGate (Avisoft, Germany) connected to a computer equipped with Avisoft-RECORDER software (Avisoft, Germany). We did not set a cut-off threshold for analyzing the frequency range.

Call type classification. We used VocalMat to classify call types, as this analytical software has the lowest false discovery rate (5%) compared with other published software (5). The outputs of the segmentation process of ultrasonic vocalization candidates were manually labeled in accordance with those of Scattoni et al. (6) and are thus compatible with our previous analyses (2). This software classifies the ultrasonic vocalization candidates into the following call types: complex, step-up, step-down, two-steps, multiple-steps, upward frequency modulation, downward frequency modulation, flat, short, chevron, reverse chevron, and noise. VocalMat tends to classify calls based on the most prominent component but flags them as potential harmonic call types. We manually added harmonics by inspecting the whole spectrum of each call instead of the most prominent component. Calls that were close to a call type but did not satisfy at least one criterion of the call classification were classified as ambiguous (see **Figure S1**).

Social interaction. Each 10-week-old +/+ or Dup/+ mouse and a stranger C57BL/6J mouse of the same age (+1 week) were randomly selected and were simultaneously placed in a novel test box together (37 cm long × 26 cm wide × 19 cm high; 30 lux) and left there during two 5-minute sessions with a 30-minute inter-session interval in accordance with our published protocol (3, 7). An acrylic plate was placed on the top of the cage during testing. Social behavior was monitored by a CCD camera connected to a Macintosh computer. Behavior was manually rated in accordance with our published procedure (1, 3, 7-11). The number and duration of affiliative social interactions were measured and used for analysis.

Quantitative reverse transcription polymerase chain reaction (qRT-PCR).

Up to 4 to 5 days following social interaction testing at 10 weeks of age, the mice were euthanized, and the prefrontal cortex, along with the remainder of the forebrain, excluding the olfactory bulb, cerebellum, and brainstem, was extracted. The intervals between social interaction testing and euthanasia were comparable for the +/+ and Dup/+ groups (+/+, Average = 4.8 days (SEM = 0.385); Dup/+, Average = 5.2 days (SEM = 0.445)). A Mann-Whitney U test revealed no significant difference (U = 316, p = 0.428).

qRT-PCR was carried out in accordance with our published procedure (12). Total RNA was extracted from the brain regions using an RNeasy Plus Mini Kit (Cat#74134, Qiagen, Germantown, USA). Complementary DNA (cDNA) was synthesized from total RNA using SuperScript IV VILO Master Mix (Cat#11766050, Invitrogen, Carlsbad, USA). qRT-PCR reactions were performed in triplicate on a QuantStudio 6 Flex Real-Time PCR System (Cat#4485694, Applied Biosystems, Waltham, USA) using the TaqMan Fast Advanced Master Mix (Cat#4444963, Applied Biosystems, Waltham, USA). The Taqman probes are listed in the Supplementary Material (**Table S1**). Data were analyzed using the ΔΔCt method and normalized to the reference gene *18S*.

Uniform manifold approximation and projection (UMAP). We used the Python library “umap-learn” (version 0.5.5) to classify calls based on the quantitative parameters of VocalMat, including the length (duration) and bandwidth of each call, the minimum and maximum frequency values in kHz (min_freq_main, max_freq_main, mean_freq_main, min_freq_total, max_freq_total, mean_freq_total), and the sound intensity in dB (min_intens_total, max_intens_total, mean_intens_total) of various components of each call, where “main” and “total” designate the most intense wave component and all wave components, respectively, of each call. We then added call types to each data point in UMAP clusters (13).

Call sequence analysis. A call sequence was defined as a series of calls with inter-call intervals below the intersection between the theoretical and observed distribution curves of inter-call intervals (2, 3, 13). Accordingly, two calls with longer inter-call intervals than the cross point of the two curves are the last and first calls of two distinct call sequences (**Figure S4**).

Shannon entropy analysis. We applied Shannon entropy analysis to call sequences of up to length four to determine their overall structure of unpredictability. Statistical analysis of entropy data was carried out using a mixed linear model, with entropy being modeled as a function of both group and level, with each pup having its baseline entropy (**Figure S5**).

Non-Markov sequences. The standard proportions of two-call pairs within so-defined sequences were also analyzed using our published procedure (2, 3, 13) (**Figure S6**).

Markov modeling. Two-call pairs within so-defined sequences were analyzed with Markov modeling using our published procedure (2, 3, 13).

Least absolute shrinkage and selection operator (Lasso) model. We extracted predictive variables from the numbers and proportions of each call type and two-call pairs within sequences for individual social interaction scores using the Lasso regression model (3, 13). We validated the identified predictors by generating five smaller sample sets through the random exclusion of five or six mice, followed by the execution of Lasso regression models on each set.

Correlation coefficients. The correlation coefficients between the relative expression levels of each gene encoded in our mouse model of paternally inherited 15q11 duplication and the social interaction scores were calculated and their significance was determined.

Maternal approach. A Plexiglas mouse home cage was modified to measure maternal approach to neonatal vocalizations, using our published apparatus and procedure (2) (see **Figure 2A**). It was stationed in a sound-proof booth. One nanocrystalline silicon (nc-Si) sound emitter was placed facing the wire mesh net-covered end of one of the two tubes. The odor of bedding was collected on a cotton ball, on which three randomly chosen pups from the litter were placed for 3 hrs. The cotton ball was placed in a plastic tube near the emitter and the mesh. Ultrasonic vocal calls were played back using a nanocrystalline silicon (nc-Si) emitter, composed of a surface-heating thin-film electrode, an ns-Si layer, and a single-crystalline silicon wafer. The electrical signals generated were supplied as voltage inputs through a high frequency amplifier to more faithfully reproduce pup vocalizations of high frequencies than commercially available vibration-based speakers. To evaluate the accuracy of sound emitted from our device, ultrasonic sound was monitored by a condenser microphone (CM16/CMPA, Avisoft Bioacoustics, Germany). An amplifier (UltraSoundGate116H, Avisoft Bioacoustics, Germany) analyzed data using an analog-to-digital converter, frequency filters, digital first-Fourier-transform analysis, and signal input-output terminals. Input signals were monitored with spectrum software (Avisoft-SASLab Pro 3.0, Avisoft Bioacoustics, Germany).

We chose calls of a single representative P12 +/+ pup and a single representative P12 Dup/+ pup. The representative calls of each genotype were defined as follows: We computed the difference scores between each pup and the group median in the percentages an numbers of each of the thirteen call types; the absolute values of the difference scores were used to reflect a deviation from the median regardless of the direction (i.e., higher or lower than the median); these scores were summed for all call types. The pup with the smallest sum score was chosen from each genotype (**Figure S9-1** to **S9-4**). The calls of the representative +/+ pup and Dup/+ pup were played back.

This approach was the most practical and feasible one for two reasons. First, calls from many pups cannot be sequentially presented to a single female mother due to a rapid habituation to repeated presentations of calls(14). Second, our pilot study showed that each call sample requires 10 or more mothers to detect statistical significance due to inherently variable responses among different mothers.

Male and female C57BL/6J mice (#000664, Jackson Laboratory, Bar Harber, ME) were paired and pregnant female mice were separated singly when a vaginal plug was noted. The lactating mother was used at 12 day postpartum. We used mothers that had up to four litters, as there was no correlation between the number of litters they produced and the maternal approach parameters.

The basic procedure is detailed in our published work (2): Day 1, habituation in the home cage in the soundproof booth overnight; Day 2, a 5-min test day. Mothers were placed in the test apparatus for 30 min in the soundproof room, and exposed to the representative +/+ or Dup/+ calls. Calls were played back at the end of one of the two tubes; no sound was presented at the other tube. The mother mouse was allowed to freely choose, move, and stay anywhere in the apparatus during the 5-min test. After testing, the mother was returned to the home cage and placed back to the mouse room.

The mother’s behavior was recorded by a video camera. Recorded behavior was classified by the Noldus software (Noldus Information Technology, Leesburg, VA) into the time the mother’s nose peeked at the entrance of each tube, time the mother’s nose stayed at the end of the sound tube (i.e. closest place to the emitter), and the latency to poke the nose to the tubes.

**Supplementary Figure S1**. Representative sonogram images of each call type. A modified VocalMat was used to classify pup calls.

**Supplementary Figure** **S2**. The percentage (mean+SEM) of each call type emitted for Dup/+ (white circle with black line) and +/+ (red) pups P P8 and P12. The assumptions of normality and homogeneity of variance were violated in many cases (see **Table S1-Figure S2**). We applied Mann-Whitney nonparametric tests, and significance was adjusted by Benjamini–Hochberg corrections with a false discovery rate of 5%. Har, harmonic; Su, step-up; Ts, two-steps; Cx, complex; Sd, step-down; Ms, multiple-steps; D, downward; Ch, chevron; Sh, short; F, flat; U, upward; R Ch, reverse chevron; Amb, ambiguous. Red call type names are those of more than one wave or complex waves; blue call type names are those of relatively simple waves(2, 3). P8: +/+, n=29; Dup/+, n=25. P12: +/+, n=28; Dup/+, n=25. *, p<0.05; **, p<0.01. One +/+ pup emitted no call at P12 and call percentages were not calculated.

**Supplementary Figure S3-1 to S3-4.** The individual positions of each call type in two-dimensional UMAPs (uniform manifold approximation and projections). P, postnatal day. The distributions of each call type of +/+ at P8, Dup/+ at P8, +/+ at P12, and Dup/+ at P12 are plotted in the UMAP. Har, harmonic; Su, step-up; Ts, two-steps; Cx, complex; Sd, step-down; Ms, multiple-steps; D, downward; Ch, chevron; Sh, short; F, flat; U, upward; R Ch, reverse chevron; Amb, ambiguous.

**Supplementary Figure S4.** Percentages of inter-call intervals.The observed (black lines) and expected (red lines) inter-call intervals of Dup/+ and +/+ littermates are shown for P8 (**A**) and P12 (**B**). The observed distribution significantly shifted leftward from the theoretical distributions for P8 (+/+, D=0.4759, p<0.0001; Dup/+, D=0.4373, p<0.001) and P12 (+/+, D=0.5238, p<0.0001; Dup/+, D=0.4322, p<0.001), as determined by Kolmogorov–Smirnov tests. Blue and orange vertical dash lines indicate the cross points between the observed and expected inter-call intervals of +/+ and Dup/+, respectively.

**Supplementary Figure S5**. Shannon entropy analysis of the unpredictability of the selection of call types (H0), the choice of distinct calls within the chosen call types (H1), in two-call sequences (H2), three-call sequences (H3), and four-call sequences (H4) at P8 (**A**) and P12 (**B**). Data were analyzed using a linear mixed model fitted using REML (restricted maximum likelihood) with t-test degrees of freedom approximated using the Satterthwaite method. In both genotypes, the degree of randomness declined compared with H0 (P8, H1-H4, all for p<2.0 x10-16; P12, H1-H4, all for p<2.0 x10-16). +/+ mice and Dup/+ mice did not differ at any H. P, postnatal day. *, p<0.05.

**Supplementary Figure S6.**  The mean (+SEM) numbers of calls per sequence (**A**), call sequence durations (**B**), and number of sequences emitted per 5 min (**C**). Dup/+ pups and +/+ pups did not differ in the call density (**A**, P8, t(52)=1.903, p=0.063; P12, t(51)=-0.242, p=0.8094), but Dup/+ pups has longer sequence duration than +/+ pups at P8 (**B**, P8, t(52)=2.707, p=0.0091; P12, t(51)=0.777, p=0.4409) and emitted more sequences per the 5 min test at P12 than +/+ pups (**C**. P8, U343.5, p=0.757; P12, U=138.5, p=1.00304E-05). P8: +/+, n=29; Dup/+, n=25. P12: +/+, n=28; Dup/+, n=25.

**Supplementary Figure S7.** Call connections based on non-Markov proportions oftwo-call connections at P8 (top) and P12 (bottom) for +/+ (left) and Dup/+ (right) mice.

**Supplementary Figure S8.** The representative temporal transitions of P12 calls of +/+ (top) and Dup/+ (bottom) mice in three-dimensional UMAPs.

**Supplementary Figure S9.** Proximity of calls to the group average.

**S9-1**) Sum of differences between observed and median percentages (top) and between observed and median numbers (bottom) of P12 +/+ calls.

**S9-2**) Sum of differences between observed and median two-call sequence proportions (top) and between observed and median numbers (bottom) of P12 +/+ calls. Calls of mouse ID m43 had the smallest difference from the group median in all measures.

**S9-3**) Sum of differences between observed and median two-call sequence percentages (top) and between observed and median numbers (bottom) of P12 Dup/+ calls.

**S9-4**) Sum of differences between observed and median two-call sequence proportions (top) and between observed and median numbers (bottom) of P12 Dup/+ calls. Calls of mouse ID m45 had the smallest difference from the group median in all measures.

**Supplementary Figure S10.**  Maternal approach in response to the two tubes ((S) and (nS)) in which no sound was played back as a negative control to determine the baseline preference for the two tubes. We analyzed time the mother’s nose peeking at the two entrances (**A**) and ends (**B**) of the tubes, and (**C**) latency to enter the entrances of the two tubes. Mothers spent indistinguishable amounts of time peeking at the two tubes (**A**, p=0.4254), at the ends of the two tubes (**B**, p=0.3529), or latency to the first nose poke into the entrances of the two tubes (**C**, Dup/+ calls, p=0.051). N = 17.

**Supplementary Figure S11.**  The relative quantification (RQ) (mean+SEM) of gene expression levels of the rest of the forebrain of individual Dup/+ (black dots) mice relative to +/+ (red dots) mice, as determined by qRT-PCR. Statistically significant differences between +/+ and Dup/+ data are shown as *, p<0.05; **, p<0.01; ***, p<0.001, as determined by Mann-Whitney nonparametric tests; the original p values of those data that remained statistically significant after Benjamini–Hochberg correction at the false detection rate of 5% are shown. Gene expression levels were statistically significantly higher in Dup/+ than in +/+ mice for all duplicated genes examined (*, p<0.05; ***, p<0.001). *Cyfip1*, a control gene outside the duplicated chromosomal segment, did not differ between Dup/+ mice and +/+ mice (p=0.4259). The variance of gene expression was significantly larger in Dup/+ than in +/+ mice for *Mkrn3* (***, p=0.0003), *Ndn* (***, p=0.0007), *Snrpn* (**, p=0.0089), *Magel2* (**, p=0.0093), and *Gabb3* (*, p<0.05). +/+, n=26, Dup/+, n=23. Some forebrain tissues (+/+) were of poor quality and thus were not used for analysis (see **Table S11**, **Column C**, **# of samples**).

**Supplementary Figure S12.** The Akaike Information Criterion determined the number of parameters needed for the best balance between goodness of fitness and model (see **Figure 4**). The smallest AIC value indicates the best tradeoff point and its corresponding value of Fraction Deviation Explained is shown as “Cut Off” (**A**, 0.307, Social Interaction Session 1, +/+; **B**, 0.256, Social Interaction Session 1, Dup/+; **C**, 0.751, Social Interaction Session 2, +/+; **D**, 0.408, Social Interaction Session 2, Dup/+). At each cut-off, high correlation coefficients (~0.7) are achieved.

**Supplementary Figure S13.** Fraction deviance explained, and coefficients of variables based on 5 Lasso models (**Fold 1** to **5**) of samples from which 5 or 6 randomly chosen mice were excluded from analysis. Social interaction session 1 +/+ (**A**) and Dup/+ (**B**). Social interaction session 2 of +/+ (**C**) and Dup/+ (**D**). The colors of lines are arbitrarily assigned. The number (N) and proportions (P) of each call type, number (N) and probabilities (P) of two-call sequences, Markov probabilities (MP) of two-call sequences, and gene expression scores of the prefrontal cortex were pooled and used for selection. The dependent variable was affiliative social interaction scores. Variables identified in the original Lasso models (see **Figure 4**) are underlined in red each validation model. Har, harmonic; Su, step-up; Ts, two-steps; Cx, complex; Sd, step-down; Ms, multiple-steps; D, downward; Ch, chevron; Sh, short; F, flat; U, upward; R Ch, reverse chevron; Amb, ambiguous.

**Supplementary Figure S14.** Correlation plots of each mouse based on their gene expression (ratio to the average of +/+) in the prefrontal cortex and social interaction scores at session 2 (SI2 of Y axis) of +/+ (red dots) and Dup/+ (white dots with black lines) mice. Correlation coefficients (R) were separately computed for each genotype. P values that remained significant after correction for multiple comparisons at 5, 10 and 25% FDR are indicated in **Table S2-Figure S14**.

**References**

1. Hiramoto T, Kang G, Suzuki G, Satoh Y, Kucherlapati R, Watanabe Y, et al. Tbx1: identification of a 22q11.2 gene as a risk factor for autism spectrum disorder in a mouse model. Hum Mol Genet. 2011;20(24):4775–85.

2. Takahashi T, Okabe S, Broin PO, Nishi A, Ye K, Beckert MV, et al. Structure and function of neonatal social communication in a genetic mouse model of autism. Mol Psychiatry. 2016;21(9):1208–14.

3. Nakamura M, Ye K, MB ES, Yamauchi T, Hoeppner DJ, Fayyazuddin A, et al. Computational identification of variables in neonatal vocalizations predictive for postpubertal social behaviors in a mouse model of 16p11.2 deletion. Mol Psychiatry. 2021;26(11):6578–88.

4. Semple BD, Blomgren K, Gimlin K, Ferriero DM, Noble-Haeusslein LJ. Brain development in rodents and humans: Identifying benchmarks of maturation and vulnerability to injury across species. Prog Neurobiol. 2013;106-107:1–16.

5. Fonseca AH, Santana GM, Bosque Ortiz GM, Bampi S, Dietrich MO. Analysis of ultrasonic vocalizations from mice using computer vision and machine learning. Elife. 2021;10.

6. Scattoni ML, Gandhy SU, Ricceri L, Crawley JN. Unusual repertoire of vocalizations in the BTBR T+tf/J mouse model of autism. PLoS One. 2008;3(8):e3067.

7. Hiramoto T, Boku S, Kang G, Abe S, Nagashima M, Barbachan e Silva M, et al. Transcriptional regulation of neonatal neural stem cells is a determinant of social behavior. BioRxiv. 2023;<https://www.biorxiv.org/content/10.1101/2021.11.12.468452v2>.

8. Suzuki G, Harper KM, Hiramoto T, Funke B, Lee M, Kang G, et al. Over-expression of a human chromosome 22q11.2 segment including TXNRD2, COMT and ARVCF developmentally affects incentive learning and working memory in mice. Human Molecular Genetics. 2009;18(20):3914–25.

9. Suzuki G, Harper KM, Hiramoto T, Sawamura T, Lee M, Kang G, et al. Sept5 deficiency exerts pleiotropic influence on affective behaviors and cognitive functions in mice. Human Molecular Genetics. 2009;18(9):1652–60.

10. Harper KM, Hiramoto T, Tanigaki K, Kang G, Suzuki G, Trimble W, et al. Alterations of social interaction through genetic and environmental manipulation of the 22q11.2 gene Sept5 in the mouse brain. Human Molecular Genetics. 2012;21(15):3489–99.

11. Yamauchi T, Kang G, Hiroi N. Heterozygosity of murine Crkl does not recapitulate behavioral dimensions of human 22q11.2 hemizygosity. Genes Brain and Behavior. 2020;20(5):e12719.

12. Hiramoto T, Sumiyoshi A, Yamauchi T, Tanigaki K, Shi Q, Kang G, et al. Tbx1, a gene encoded in 22q11.2 copy number variant, is a link between alterations in fimbria myelination and cognitive speed in mice. Mol Psychiatry. 2022;27(2):929–38.

13. Sakamoto Y, Takano T, Shimoyama S, Hiramoto T, Hiroi N, Nakamura K. Prepartum bumetanide treatment reverses altered neonatal social communication but non-specifically reduces post-pubertal social behavior in a mouse model of fragile X syndrome. Genomic Psychiatry. 2025;1(1):61–72.

14. Hammerschmidt K, Radyushkin K, Ehrenreich H, Fischer J. Female mice respond to male ultrasonic 'songs' with approach behaviour. Biol Lett. 2009;5(5):589–92.
